# Supplementary material for: Identification and Characterization of TMEM119-Positive Cells in the Postnatal and Adult Murine Cochlea
Source: MDPI journal article supplement (doi:10.3390/brainsci13030516), 2023-03-20
Supplement: s1 [file s1]

## Supplementary Materials

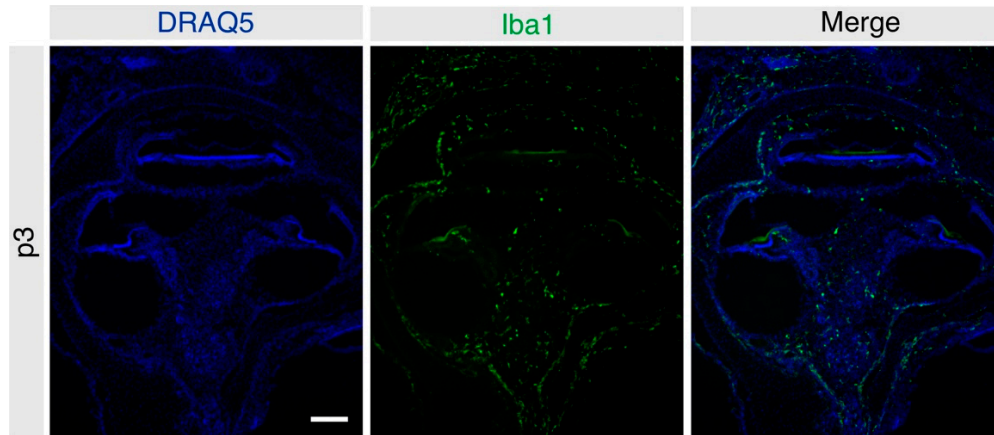

**Figure S1.** Frozen sections of the immature mouse cochlea at p3 stained for Iba1 (green). Nuclei were counterstained with DRAQ5-labeling (blue). Iba1 expression was observed in scattered cells with dendritic morphology across different cochlear regions at p3. Scale bar: 200  $\mu$ m.
